# Supplementary material for: A Genome-Wide Association Study on the Seedless Phenotype in Banana (Musa spp.) Reveals the Potential of a Selected Panel to Detect Candidate Genes in a Vegetatively Propagated Crop
Source: PubMed Central journal article supplement (PMC4856271; doi:10.1371/journal.pone.0154448), 2016-05-04

a.

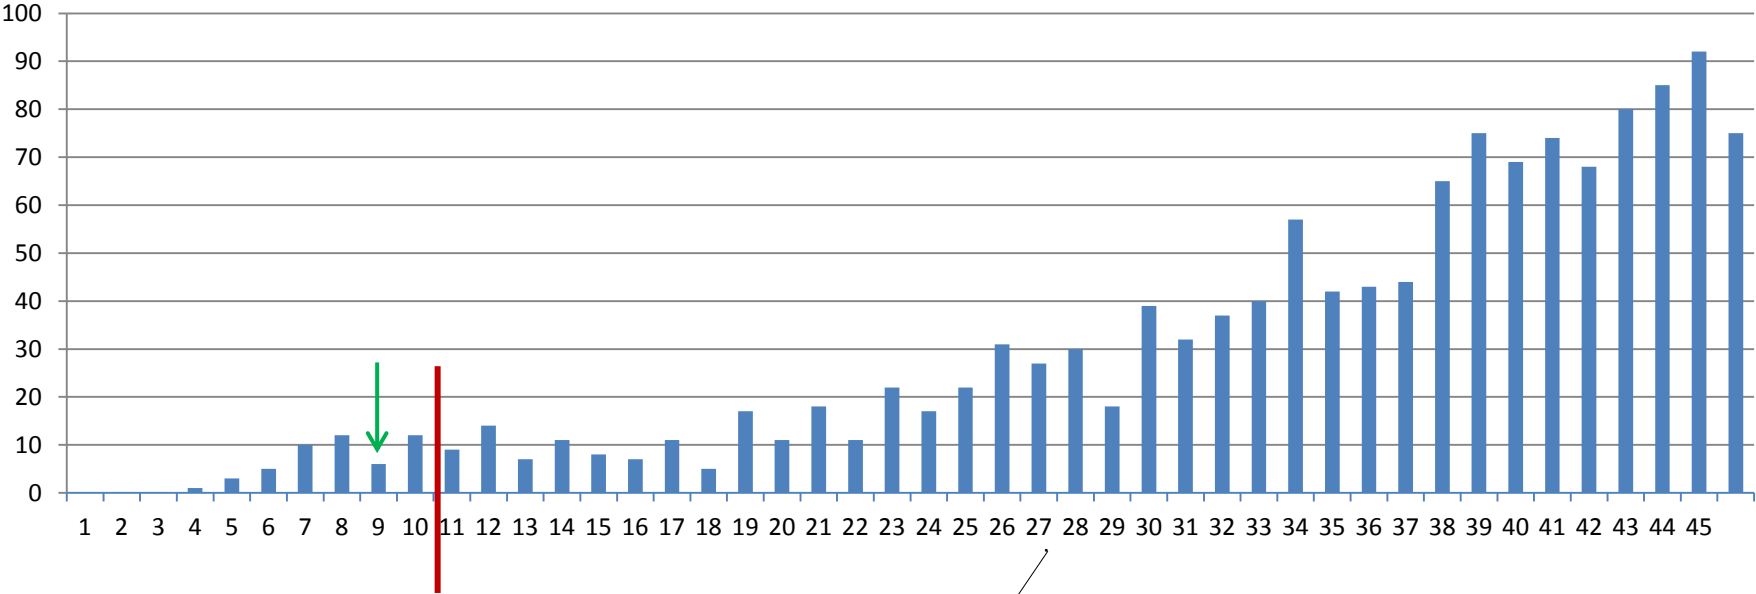

b.

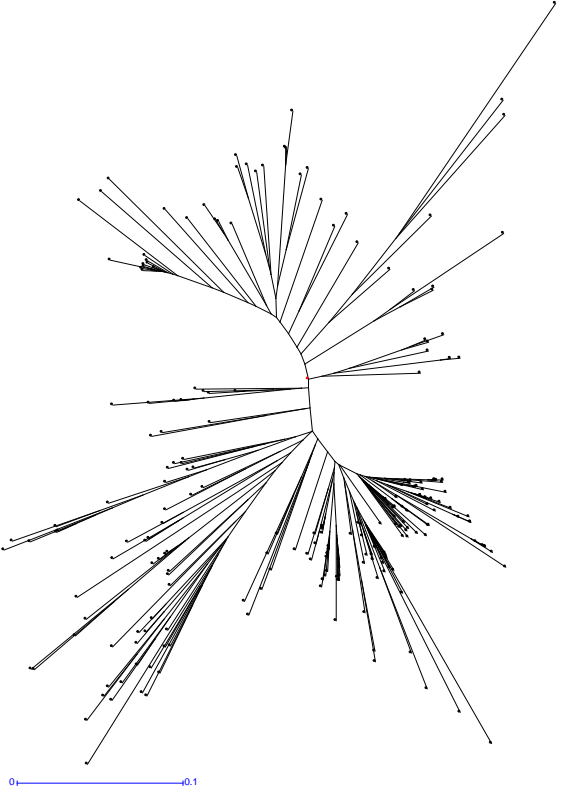

Supplement: pone.0154448.s001.pdf [file pone.0154448.s001.pdf]
