# Supplementary material for: A Genome-Wide Association Study on the Seedless Phenotype in Banana (Musa spp.) Reveals the Potential of a Selected Panel to Detect Candidate Genes in a Vegetatively Propagated Crop
Source: PubMed Central journal article supplement (PMC4856271; doi:10.1371/journal.pone.0154448), 2016-05-04

Panel MAF 5% GLM

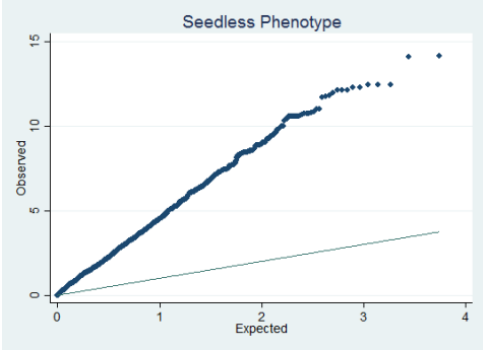

Panel MAF 5% MLM K + Q (K=4)

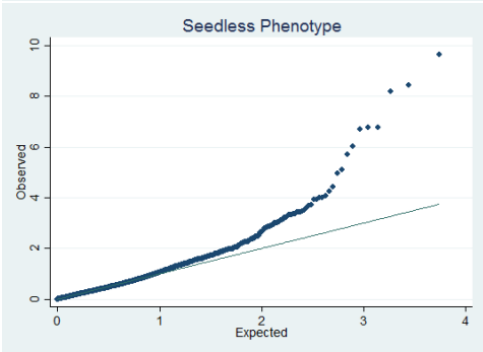

Subset MAF 5% GLM

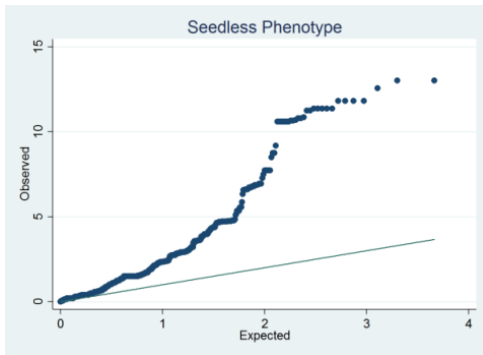

Subset MAF 5% MLM K

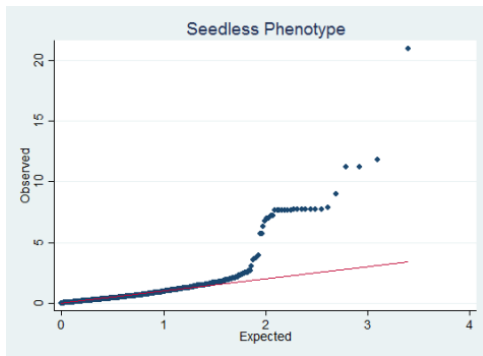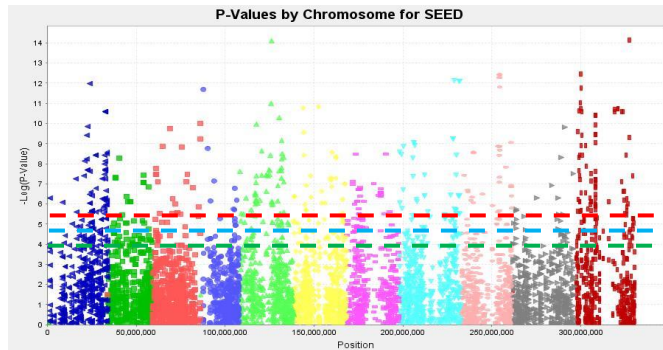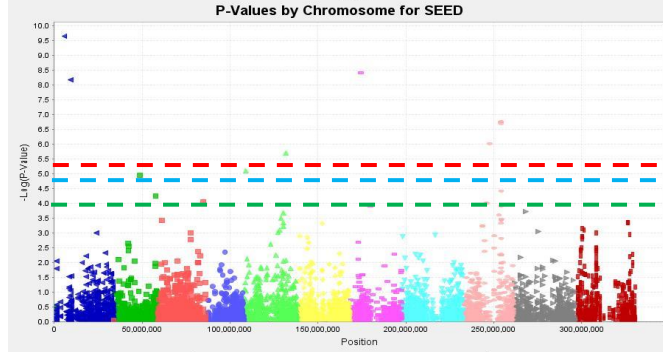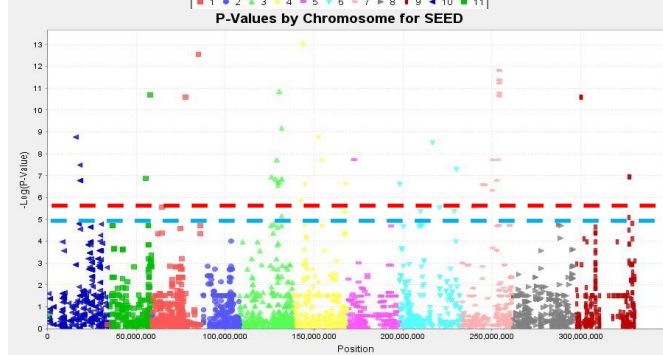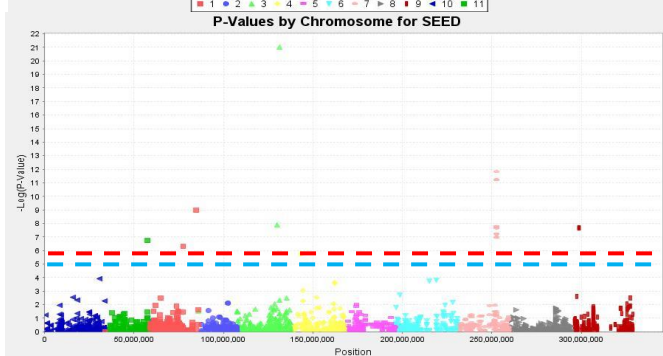

Supplement: pone.0154448.s003.pdf [file pone.0154448.s003.pdf]
